# Supplementary material
Source: PubMed Central journal article supplement (PMC9712298)
Supplement: mmc1.pdf [file mmc1.pdf]

### **Gregorio Marañón Microbiology-ID COVID 19 Study Group**

Adán-Jiménez (Javier), Alcalá (Luis), Aldámiz (Teresa), Alonso (Roberto), Álvarez (Beatriz), Álvarez-Uría (Ana), Arias (Alexi), Arroyo (Luis Antonio), Berenguer (Juan), Bermúdez (Elena), Bouza (Emilio), Buenestado (Sergio), Burillo (Almudena), Candela (Ana), Carrillo (Raquel), Catalán (Pilar), Cercenado (Emilia), Cobos (Alejandro), de la Cueva (Víctor Manuel), Díez (Cristina), Escribano (Pilar), Estévez (Agustín), Fanciulli (Chiara), Galar (Alicia), García (M<sup>a</sup> Dolores), García de Viedma (Darío), Gijón (Paloma), González (Adolfo), Guillén (Helmuth) Guinea (Jesús), Haces (Laura Vanessa), Herranz (Marta), Kestler (Martha), López (Juan Carlos), Losada (Carmen Narcisa), Machado (Marina), Marín (Mercedes), Martín (Pablo), Montilla (Pedro), Muñoz (Patricia), Olmedo (María), Padilla (Belén), Palomo (María), Parras (Francisco), Pérez-Granda (María Jesús), Pérez-Lago (Laura), Pérez (Leire), Pescador (Paula), R Maus (Sandra), Reigadas (Elena), Rico-Luna (Carla Margarita), Rincón (Cristina), Rodríguez (Belén), Rodríguez (Sara), Rodríguez-Grande (Cristina), Rojas (Adriana), Ruiz-Serrano (María Jesús), Sánchez (Carlos), Sánchez (Mar), Serrano (Julia), Sola Campoy (Pedro J), Tejerina (Francisco), Valerio (Maricela), Veintimilla (M<sup>a</sup> Cristina), Vesperinas (Lara), Vicente (Teresa), de la Villa (Sofía).

### **Hospital Universitario 12 de Octubre Microbiology COVID-19 Study group**

Brañas (Patricia), Bueno (Paula), Delgado (Rafael), Folgueira (María Dolores), Gómez-Herrador (Alberto), González-Bodí (Sara), Labiod (Nuria), Lasala (Fátima), López-Roa (Paula), Luczkowiak (Joanna), Meléndez (María Angeles), Muñoz-Gallego (Irene), Orellana (María Angeles), Pérez de Ayala (Ana), Pérez-Rivilla (Alfredo), Recio (Raúl), Reyes (Alhena), Rivas (Gonzalo), Rolo (Marta), Sigcha (Mayra), Viedma (Esther), Villa (Jennifer).

### **Hospital Universitario Fundación de Alcorcón Microbiology-ID COVID-19 Study group**

Losa-García, Juan E. Hospital Universitario Fundación Alcorcón,  
Goyanes-Galán, M. José. Hospital Universitario Fundación Alcorcón,Fradejas-  
Villajos, Isabel. Hospital Universitario Fundación Alcorcón,  
Campelo-Gutiérrez, Carolina. Hospital Universitario Fundación Alcorcón,  
López-Wolf, Daniel. Hospital Universitario Fundación Alcorcón,  
Iglesias-Franco, Higinio. Centro de Salud Laín Entralgo. Alcorcón,  
Murciano-Antón, M<sup>a</sup> Aránzazu. Centro de Salud Laín Entralgo. Alcorcón.  
Martín - De Cabo, María Rosa. Centro de Salud Laín Entralgo. Alcorcón.  
Tejera-Nevado, Ana. Centro de Salud Laín Entralgo. Alcorcón.  
Alonso - San Román, Consuelo. Centro de Salud Laín Entralgo. Alcorcón.  
Algora Weber, Alejandro. Hospital Universitario Fundación Alcorcón  
Bonilla Zafra, Gregorio. Hospital Universitario Fundación Alcorcón  
Bueno Campaña, M<sup>a</sup> Mercedes. Hospital Universitario Fundación Alcorcón  
Casas Losada, M<sup>a</sup> Luisa. Hospital Universitario Fundación Alcorcón  
Castilla Castellano, Virgilio. Hospital Universitario Fundación Alcorcón  
Diaz Cuasante, Ana Isabel. Hospital Universitario Fundación Alcorcón  
Fariña Garcia, Rosa Maria. Hospital Universitario Fundación Alcorcón  
Galan Melendez, Isabel M<sup>a</sup>. Hospital Universitario Fundación Alcorcón  
Garcia del Valle y Manzano, Santiago. Hospital Universitario Fundación Alcorcón  
Gonzalez Anglada, Maria Isabel. Hospital Universitario Fundación Alcorcón  
Izquierdo Patron, M<sup>a</sup> Mercedes. Hospital Universitario Fundación Alcorcón  
Lorenzo Martinez, Susana. Hospital Universitario Fundación Alcorcón  
Mosquera Gonzalez, Margarita. Hospital Universitario Fundación Alcorcón  
Noguera Quijada, Carmen. Hospital Universitario Fundación Alcorcón  
Perez Encinas, Montserrat. Hospital Universitario Fundación Alcorcón  
Renilla Sanchez, Maria Esther. Hospital Universitario Fundación Alcorcón  
Rodriguez Caravaca, Gil. Hospital Universitario Fundación Alcorcón  
Velasco Arribas, Maria. Hospital Universitario Fundación Alcorcón
